# Supplementary material for: Association of PTPN22-C1858T Polymorphism With Susceptibility to Mycobacterium tuberculosis and Mycobacterium leprae Infection: A Meta-Analysis
Source: PubMed Central journal article supplement (PMC7950544; doi:10.3389/fimmu.2021.592841), 2021-02-25
Supplement: DataSheet_1.pdf [file DataSheet_1.pdf]

*Supplementary Material*

Supplement 1

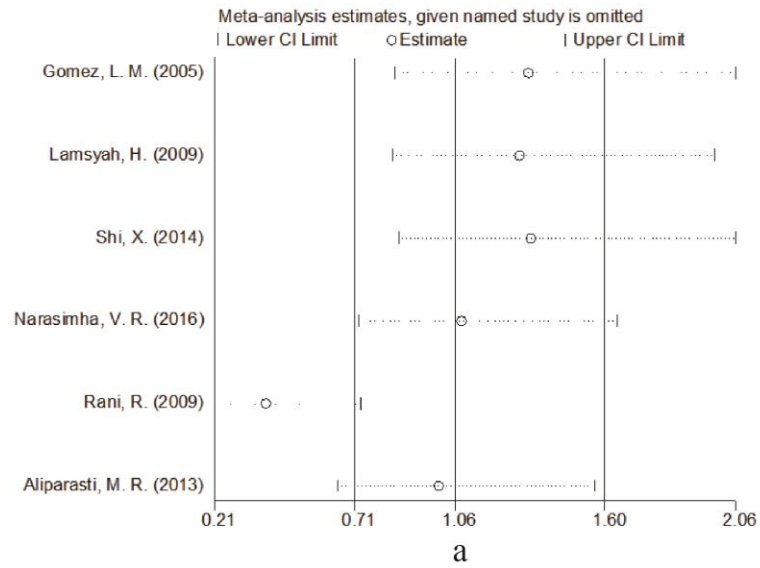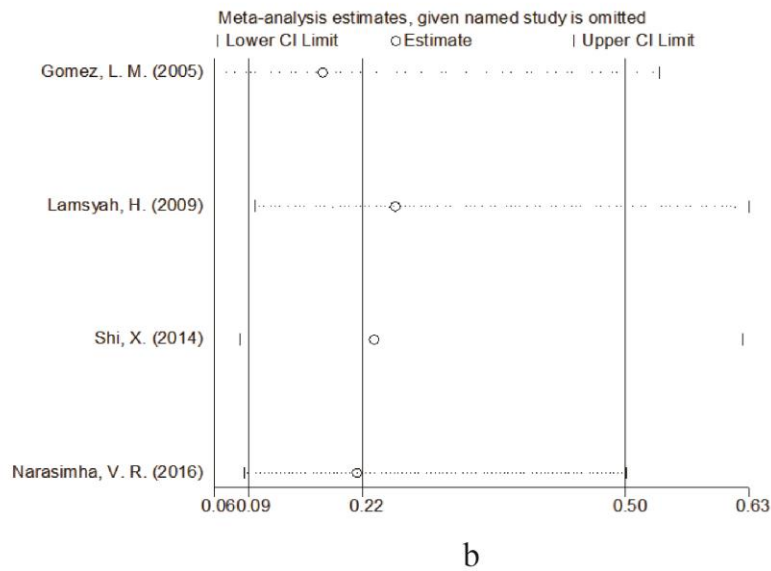

**Supplementary Figure 1.** Sensitivity analysis for the effect of each study on pooled ORs for the correlation between susceptibility to *M. tuberculosis* (a) and *M. leprae* (b) infection and rs2476601 PTPN22-C1858T polymorphism (C vs. T).
