# Supplementary material for: Association of PTPN22-C1858T Polymorphism With Susceptibility to Mycobacterium tuberculosis and Mycobacterium leprae Infection: A Meta-Analysis
Source: PubMed Central journal article supplement (PMC7950544; doi:10.3389/fimmu.2021.592841), 2021-02-25
Supplement: DataSheet_3.pdf [file DataSheet_3.pdf]

**Association of *PTPN22*-C1858T polymorphism with susceptibility to *Mycobacterium tuberculosis* and *Mycobacterium leprae* infection: a meta-analysis**

**Table S1. Newcastle-Ottawa quality assessment scale for six case-control studies included in the meta-analysis.**

| First author, year      | Selection       |                             |                       |                        | Comparability             |                   | Exposure                  |                                                     |                   | Quality |
|-------------------------|-----------------|-----------------------------|-----------------------|------------------------|---------------------------|-------------------|---------------------------|-----------------------------------------------------|-------------------|---------|
|                         | Case Definition | Representativeness of cases | Selection of Controls | Definition of Controls | The most important factor | Additional factor | Ascertainment of exposure | Same method of ascertainment for cases and controls | Non-Response rate |         |
| Gomez, L. M., 2005      | a               | a                           | c                     | a                      | race                      | yes               | b                         | a                                                   | a                 | 8       |
| Lamsyah, H., 2009       | a               | a                           | c                     | a                      | sex                       | yes               | b                         | a                                                   | a                 | 8       |
| Shi, X., 2014           | a               | a                           | b                     | a                      | no                        | yes(age)          | b                         | a                                                   | a                 | 7       |
| Narasimha, V. R., 2016  | a               | a                           | c                     | a                      | no                        | no                | b                         | a                                                   | a                 | 6       |
| Rani, R., 2009          | a               | a                           | c                     | a                      | race                      | no                | b                         | a                                                   | a                 | 7       |
| Aliparasti, M. R., 2013 | a               | a                           | a                     | a                      | no                        | no                | b                         | a                                                   | a                 | 7       |
